# Supplementary material
Source: Springer Nature journal article supplement (https://www.springermedizin.de/resource/supplementary/12871_2014_240_MOESM1_ESM.pdf/9429216)
Supplement: MOESM1 [file 9429216]

120 intended intraoperative measurements

9 impaired intraoperative measurements due to constant cautery (1), more than one electrode with insufficient skin contact (8, 5 of these consecutively in a single patient)

111 valid intraoperative measurements (93%)

9 measurements with one electrode with insufficient skin contact (8 of these in a single patient)
